# Supplementary material for: GSTP1Methylation and Protein Expression in Prostate Cancer: Diagnostic Implications
Source: Hindawi journal article supplement (doi:10.1155/2016/4358292), 2016-01-01
Supplement: f1 [file 4358292.f1.pdf]

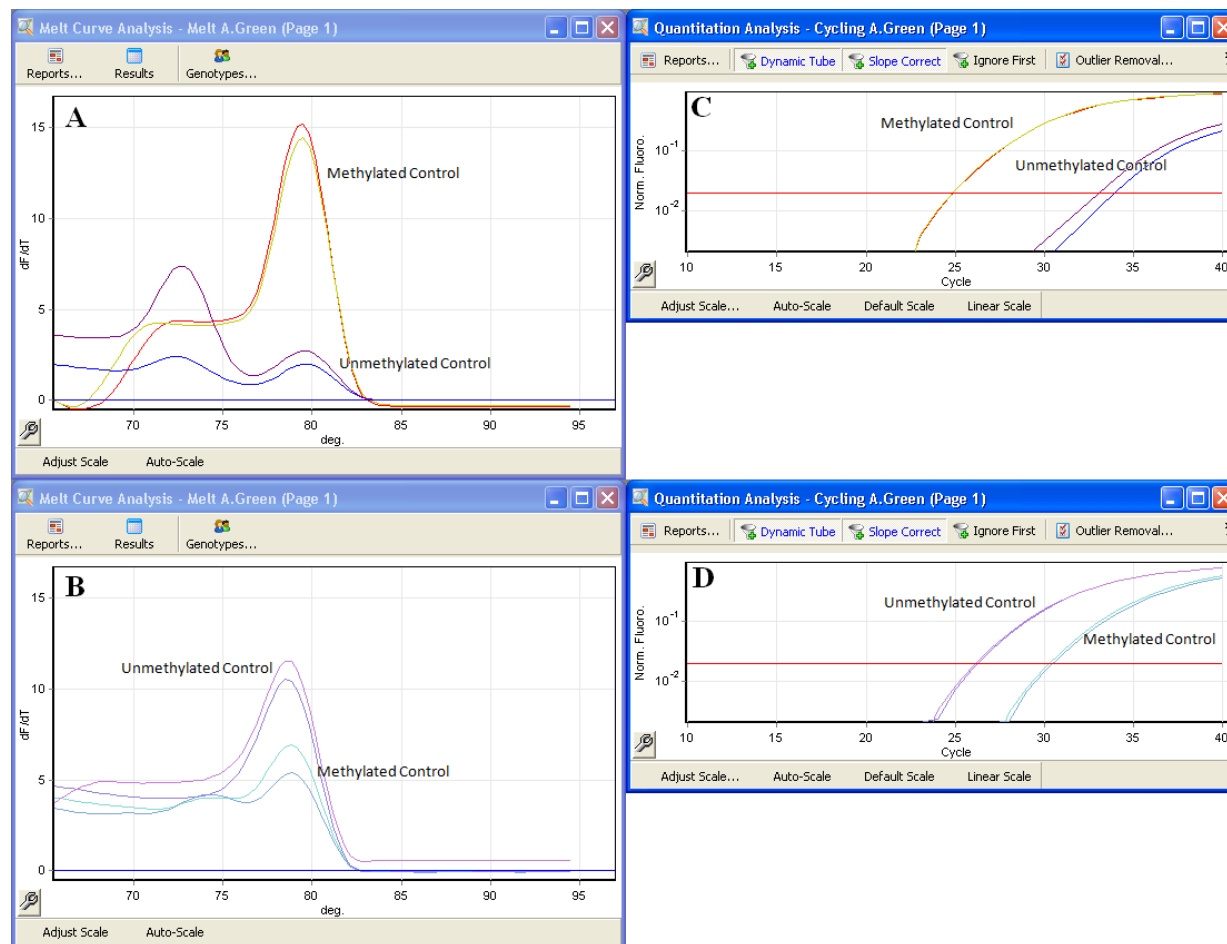

## Supplementary Figure S1

Melting curves for A) methylated and B) unmethylated reactions. Amplification plot for C) methylated and D) unmethylated reactions

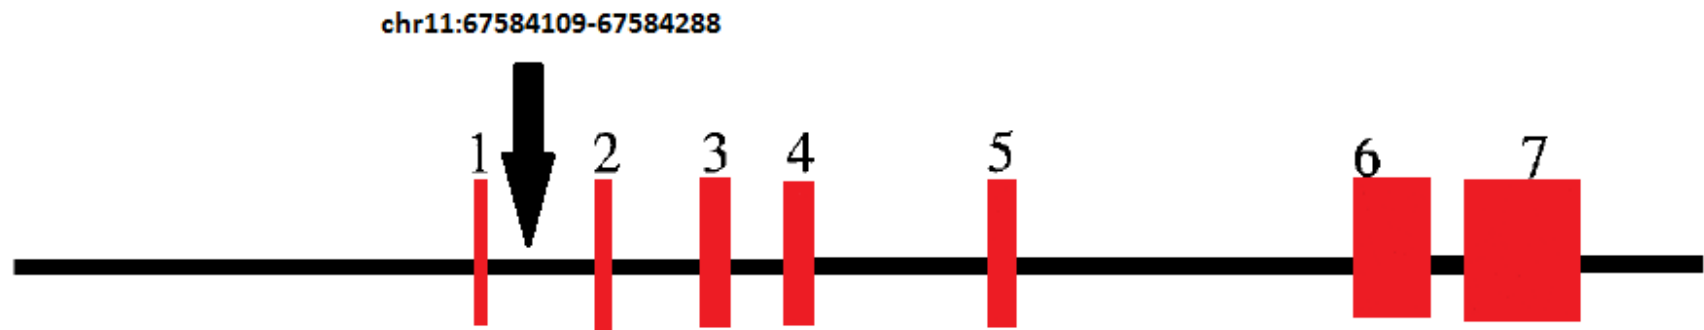

**Supplementary Figure S2**

*GSTP1* amplicon is located in chromosome 11 and starts at 67584109 and ends at 67584288 position. The exons are represented in red.
